# Supplementary material for: Physician Payments from Industry Are Associated with Greater Medicare Part D Prescribing Costs
Source: PubMed Central journal article supplement (PMC4868346; doi:10.1371/journal.pone.0155474), 2016-05-16
Supplement: pone.0155474.s001.pdf [file pone.0155474.s001.pdf]

## Supplemental Figure. CONSORT-like diagram of matching process

### Database cleaning

Records in 2013 Medicare Part D database (MPD):  
N = 1,049,381

=> omit 6,755 non-individual records

n = 1,042,646 MPD individuals

=> omit 317,477 non-DO and non-MD individuals

n = 725,169 MPD individuals with DO or MD degree

Records in 2013 Open Payment Program database (OPP):  
N = 4,055,634

=> omit 23,247 non-individual records

n = 4,032,387 records (multiple records per individual)  
= 468,974 OPP individuals

=> omit 61,754 non-DO and non-MD individuals

n = 407,220 OPP individuals with DO or MD degree

### Physician matching:

|                                |           |        |
|--------------------------------|-----------|--------|
| Round 1: first/last/middle/zip | n=295,541 | 85.38% |
| Round 2: first/last/zip        | n=20,402  | 5.89%  |
| Round 3: first/last/middle     | n=30,191  | 8.72%  |

=> omit 61,086 unmatched individuals in OPP

n = 346,134 matches remaining

=> omit 3,872 ambiguous from wave 3

n = 342,262 matches remaining

=> collapse 618 duplicate NPI

n = 341,644 matched individuals with MD or DO degree<sup>^</sup>

<sup>^</sup> 65,576 (16.1%) unmatched MD or DO individuals in MPD data after exclusion of incorrect/ambiguous matches and collapse of duplicates.
