# Supplementary material for: Physician Payments from Industry Are Associated with Greater Medicare Part D Prescribing Costs
Source: PubMed Central journal article supplement (PMC4868346; doi:10.1371/journal.pone.0155474), 2016-05-16

Distribution of income from Sunshine Act payments

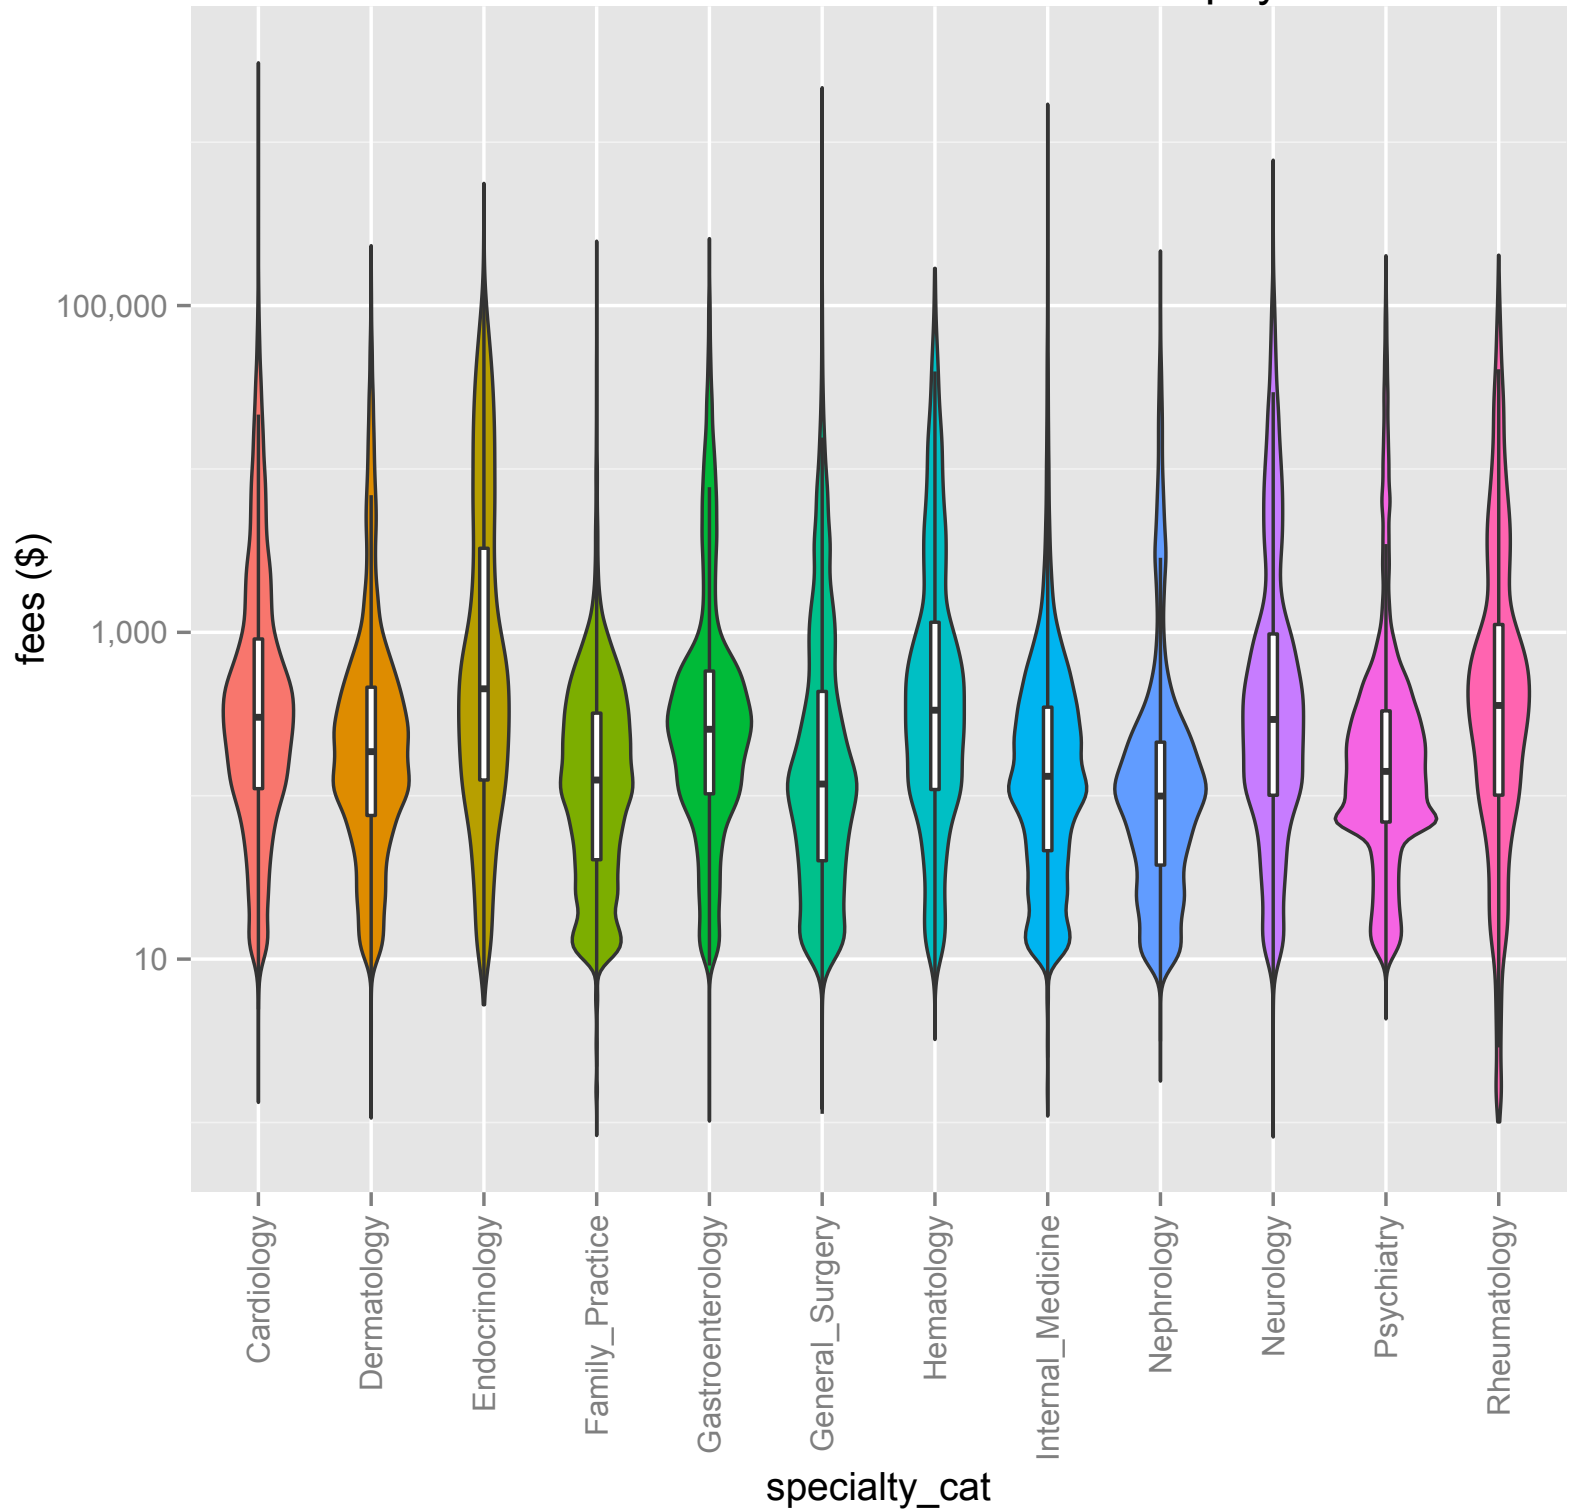

Supplement: pone.0155474.s002.pdf [file pone.0155474.s002.pdf]
