# Supplementary material for: Physician Payments from Industry Are Associated with Greater Medicare Part D Prescribing Costs
Source: PLoS One. 2016 May 16;11(5):e0155474. doi: 10.1371/journal.pone.0155474 (PMC4868346; doi:10.1371/journal.pone.0155474)
Supplement: S4 Table — (XLSX) [file pone.0155474.s006.xlsx]

## Sheet: data_for_old_or_young_increment
Supplemental Table. Incremental prescribing costs by payment quintile, adjusted for proportion of branded prescriptions, evidence for linear trend
		Incremental cost (unadjusted)			Incremental cost (adjusted)			Test for linear trend (unadjusted)		Test for linear trend (adjusted)
Quintile (vs 0)	Specialty	Estimate	SE	N	Estimate	SE	N	F (1df)^	p-value	F (1df)	p-value
1	Cardiology	5.90317	18.1877	21540	-17.7712	22.7139	13898
2	Cardiology	31.0377	18.2673	21540	-30.8995	22.8544	13898
3	Cardiology	47.2048	18.4409	21540	-41.1979	23.3865	13898
4	Cardiology	104.618	18.5357	21540	-39.8881	23.7047	13898
5	Cardiology	198.488	18.4568	21540	25.2041	23.4692	13898	75.45	0	0.12	0.7333
1	Dermatology	-18.6082	16.7314	11524	-43.9216	20.0633	5655
2	Dermatology	18.9669	16.739	11524	1.52239	20.224	5655
3	Dermatology	25.1573	16.7087	11524	-24.7741	20.3389	5655
4	Dermatology	44.909	16.7846	11524	-13.1084	20.8561	5655
5	Dermatology	240.089	16.806	11524	144.701	20.9201	5655	92.85	0	36.18	0
1	Hematology	90.3563	110.35	10516	3.94606	135.166	5402
2	Hematology	262.72	110.498	10516	97.8868	139.068	5402
3	Hematology	562.738	111.609	10516	409.384	139.033	5402
4	Hematology	715.872	112.75	10516	253.918	142.541	5402
5	Hematology	1803.23	111.374	10516	755.1	137.803	5402	124.15	0	31.23	0
1	Internal Medicine	172.376	13.7988	120414	167.931	17.8851	78669
2	Internal Medicine	240.211	13.741	120414	199.509	17.4946	78669
3	Internal Medicine	295.717	13.7561	120414	208.984	17.2251	78669
4	Internal Medicine	507.5	13.8457	120414	338.693	16.5552	78669
5	Internal Medicine	933.622	14.1383	120414	564.831	16.5791	78669	2048.8	0	932.27	0
1	General Surgery	-39.8296	11.2476	19586	-47.3633	21.8085	7867
2	General Surgery	-46.8015	11.2226	19586	-58.6208	21.2498	7867
3	General Surgery	-16.3217	11.3597	19586	-24.6656	21.9308	7867
4	General Surgery	-12.5142	11.2396	19586	-18.8071	21.1477	7867
5	General Surgery	26.7286	11.1811	19586	24.8289	21.5339	7867	0.85	0.3558	3.14	0.0765
1	Psychiatry	214.544	23.034	29998	153.293	25.1535	22858
2	Psychiatry	387.212	22.3326	29998	318.311	24.0254	22858
3	Psychiatry	461.703	22.4003	29998	385.379	24.3348	22858
4	Psychiatry	573.005	22.303	29998	454.395	24.345	22858
5	Psychiatry	813.409	22.5425	29998	590.323	25.1027	22858	839.8	0	584.15	0
1	Neurology	252.397	93.1055	11809	344.592	108.055	8007
2	Neurology	250.168	93.2954	11809	141.274	106.832	8007
3	Neurology	480.799	93.7557	11809	158.958	107.411	8007
4	Neurology	680.682	95.5953	11809	55.6564	110.301	8007
5	Neurology	2930.97	94.7172	11809	1742.58	111.043	8007	467.81	0	123.34	0
1	Endocrinology	101.65	31.5167	4900	49.9789	30.9767	4673
2	Endocrinology	144.934	31.5283	4900	88.0489	30.9291	4673
3	Endocrinology	253.512	32.0614	4900	183.171	31.312	4673
4	Endocrinology	273.121	32.2297	4900	186.545	31.8939	4673
5	Endocrinology	546.577	33.369	4900	440.352	33.0614	4673	218.49	0	172.49	0
1	Gastroenterology	-60.4108	25.7743	12192	-70.2219	39.0319	6416
2	Gastroenterology	-34.3951	25.8554	12192	-99.5403	39.9922	6416
3	Gastroenterology	-2.86463	26.0177	12192	-53.8911	40.5227	6416
4	Gastroenterology	45.6387	26.1792	12192	-15.3919	41.0588	6416
5	Gastroenterology	407.149	26.0521	12192	366.898	39.7198	6416	90.42	0	68.18	0
1	Nephrology	4.7157	46.7028	7454	8.86473	62.7525	4597
2	Nephrology	61.3296	46.9248	7454	-5.66255	63.1804	4597
3	Nephrology	94.4762	46.9384	7454	25.3172	63.3673	4597
4	Nephrology	163.979	47.159	7454	61.018	62.2634	4597
5	Nephrology	414.739	47.5605	7454	293.384	63.0116	4597	56.64	0	17.31	0
1	Family Medicine	145.774	8.26464	95901	111.772	9.8016	67209
2	Family Medicine	226.984	8.29991	95901	168.262	9.60131	67209
3	Family Medicine	292.889	8.3	95901	201.385	9.41959	67209
4	Family Medicine	408.928	8.36744	95901	264.91	9.28219	67209
5	Family Medicine	623.554	8.52932	95901	378.778	9.34914	67209	3020.68	0	1516.97	0
1	Rheumatology	54.7597	66.5658	4152	90.7989	83.4488	2289
2	Rheumatology	8.82688	66.6623	4152	-70.2583	82.5648	2289
3	Rheumatology	2.39055	67.5172	4152	4.43079	83.2784	2289
4	Rheumatology	269.808	68.9479	4152	147.118	85.5962	2289
5	Rheumatology	469.71	69.1981	4152	144.215	86.128	2289	24.78	0	3.23	0.0725
^ for comparability to adjusted, calculated only for individuals with proportion of branded claims available
